# Supplementary material for: Statistically understanding the roles of nanostructure features in interfacial ice nucleation for enhancing icing delay performance
Source: Royal Society of Chemistry journal article supplement (doi:10.1039/c9cp04103f), 2019-01-01
Supplement: c9cp04103f1.pdf [file c9cp04103f1.pdf]

*Supporting materials*

**Statistically Understanding Roles of Nanostructure Features in  
Interfacial Ice Nucleation for Enhancing the Icing Delay  
Performance**

Yizhou Shen<sup>a,\*</sup>, Xinyu Xie<sup>a</sup>, Yuehan Xie<sup>a</sup>, Jie Tao<sup>a,c,\*</sup>, Jiawei Jiang<sup>a</sup>, Haifeng Chen<sup>b</sup>,

Yang Lu<sup>a</sup>, Yangjiangshan Xu<sup>a</sup>

<sup>a</sup> College of Materials Science and Technology, Nanjing University of Aeronautics and  
Astronautics, Nanjing 210016, P. R. China

<sup>b</sup> Department of Materials Chemistry, Qiuzhen School, Huzhou University, 759, East  
2nd Road, Huzhou 313000, P. R. China

<sup>c</sup> Jiangsu Collaborative Innovation Center for Advanced Inorganic Function  
Composites, Nanjing 210009, P. R. China

\* Assoc. Professor Yizhou Shen, E-mail: shenyizhou@nuaa.edu.cn.

Professor Jie Tao, E-mail: taojie@nuaa.edu.cn.

**KEYWORDS:** nanostructure feature; solid-liquid interface; ice nucleation; icephobic  
materials

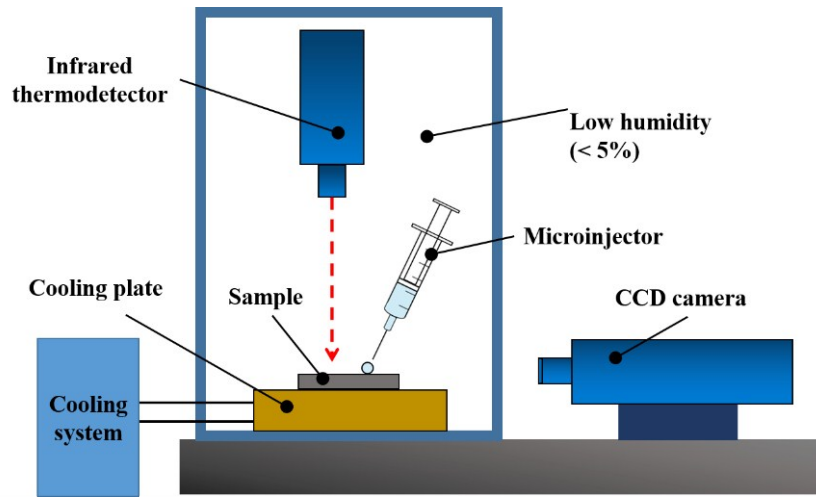

**Figure S1.** A self-made measurement device for the icing delay performance.

## Calculated process for the ice nucleation rate

The ice nucleation behaviors of the water droplets on these sample surfaces were investigated *via* employing the classical nucleation theory. In this work, we describe the nucleation rate (unit: nuclei s<sup>-1</sup> in a certain volume) of water droplet on cooled surface, building upon the framework developed by A. Alizadeh and B. Zobrist.<sup>1,2</sup>

$$J_{total}(T) = J_{bulk}(T) V + J_{lg}(T)S_{lg} + J_{sl}(T)S_{sl} \quad (1)$$

Where  $J_{total}(T)$ ,  $J_{bulk}(T)$ ,  $J_{lg}(T)$ , and  $J_{sl}(T)$  are the corresponding temperature-dependent total, bulk, liquid-gas, solid-liquid interface nucleation rates, respectively.  $V$ ,  $S_{lg}$ ,  $S_{sl}$  represent the volume of the liquid, the liquid-gas contact area, the solid-liquid contact area, respectively. Also, the  $J_{bulk}(T)$  can be expressed by:

$$J_{bulk}(T) = \frac{kT}{h} \exp\left[-\frac{\Delta Q_{diff}(T)}{kT}\right] \times n \exp\left[-\frac{\Delta G^*(T)}{kT}\right] \quad (2)$$

Where  $k$  and  $h$  are the Boltzmann ( $1.38 \times 10^{-23}$  J/K) and Planck constant ( $6.626 \times 10^{-34}$  J s).  $T$  is the absolute temperature, and  $n$  is the volume number density ( $3.1 \times 10^{28}$  m<sup>-3</sup>) of water molecules. The Gibbs free energy  $\Delta G^*(T)$  and diffusion activation energy  $\Delta Q_{diff}(T)$  are provided by:

$$\Delta G^*(T) = \frac{16\pi \gamma^3 T_m^2}{3 \Delta H_{m,v}^2 (T_m - T)} \quad (3)$$

$$\Delta Q_{diff}(T) = \frac{kT^2 E}{(T - T_0)^2} \quad (4)$$

Where the  $E$  and  $T_0$  are the fit parameters, and the values of  $T_0=118$  K and  $E= 892$  K have been determined via the experimental results by Smith and Kay.<sup>3</sup>

We assumed that the ice nucleation occurring at the interface of liquid-solid is only dominated by the heterogeneous nucleation. The  $J_{sl}(T)$  can be given by:

$$J_{sl}(T) = \frac{kT}{h} \exp\left[-\frac{\Delta Q_{diff}(T)}{kT}\right] \times n \exp\left[-\frac{\Delta G^*(T)f(\theta)}{kT}\right] \quad (5)$$

In this case,  $n$  ( $10^{19} \text{ m}^{-2}$ ) is the number density of water molecules at the interface, and  $f(\theta)$  is the wetting parameter, determined by the chemical component, ranging from 0 (complete heterogeneous nucleation) to 1 (homogeneous nucleation).  $f(\theta)$  can be given by:

$$f(\theta) = \frac{1}{4}(2 + \cos \theta)(1 - \cos \theta)^2 \quad (6)$$

For the nucleation occurring at the interface of liquid-gas, we assumed that it was the homogeneous nucleation. As a consequence, the  $J_{ig}(T)$  approximately equals to  $J_{bulk}(T)$  except the value ( $10^{19} \text{ m}^{-2}$ ) of  $n$ . Furthermore, to calculate the actual water-solid contact area, the apparent contact area  $S^*$  between the water droplet and solid surface with a radius ( $r$ ) can be calculated by:<sup>4</sup>

$$S^* = \pi r^2 \quad (7)$$

$$r = \left[ \frac{3V}{\pi(2 - 3\cos \theta^* + \cos^3 \theta^*)} \right]^{1/3} \sin \theta^* \quad (8)$$

Where  $V$  is the volume of the reference water droplet ( $V=4 \text{ }\mu\text{L}$  in this work),  $\theta^*$  is the WCA of the water droplet on the sample surface. The reference droplet on the superhydrophobic nanostructure surfaces well conforms to the Cassie-Baxter wetting model:

$$\cos \theta^* = r^* f \cos \theta + f - 1 \quad (9)$$

Where  $f$  is the fraction of the projected area of the solid surface that is wet by the liquid and  $r^*$  is the roughness factor of the wetting area.<sup>5</sup> In this wetting case, the contact

interface mainly consists of the solid-liquid and solid-air interfaces. Also, the fraction ( $f$ ) of the projected area of the solid surface that is wet by the liquid is very small (approximately 10%), therefore the wetting interface can be considered to follow the Young's equation and the  $r^*$  is considered to be approximately equal to one. Lastly, the actual water-solid contact area can be easily calculated to be 6.934 mm<sup>2</sup> for the flat substrate surface, 0.953 mm<sup>2</sup> for the layered nanoporous structures, and 0.035 mm<sup>2</sup> for the nanocone structures. Consequently, combining our experimental results about the 4  $\mu$ L water droplet on the sample surfaces, we gave the ice nucleation as a function of temperature.

## Reference

1. Alizadeh, A.; Yamada, M.; Li, R.; Shang, W.; Otta, S.; Zhong, S.; Ge, L.; Dhinojwala, A.; Conway, K. R.; Bahadur, V.; Vinciguerra, A. J.; Stephens, B.; Blohm, M. L. Dynamics of Ice Nucleation on Water Repellent Surfaces. *Langmuir* **2012**, *28*, 3180-3186.
2. Zobrist, B.; Koop, T.; Luo, B. P.; Marcolli, C.; Peter, T. Heterogeneous Ice Nucleation Rate Coefficient of Water Droplets Coated by a Nonadecanol Monolayer. *J. Phys. Chem. C* **2007**, *111*, 2149-2155.
3. Smith, R. S.; Kay, B. D. The Existence of Supercooled Liquid Water at 150 K. *Nature* **1999**, *398*, 788-791.
4. Hao, P.; Lv, C.; Zhang, X. Freezing of Sessile Water Droplets on Surfaces with Various Roughness and Wettability. *Appl. Phys. Lett.* **2014**, *104*, 161609.
5. Marmur, A. Wetting on Hydrophobic Rough Surfaces: To Be Heterogeneous or

Not To Be? *Langmuir* **2003**, *19*, 8343-8348.
